# Supplementary material
Source: Springer Nature journal article supplement (https://www.springermedizin.de/resource/supplementary/12913_2009_936_MOESM3_ESM.pdf/9536502)
Supplement: MOESM3 [file 9536502]

**Aspect:**

**Questions for each aspect (e.g. weight loss):**

Weight  
loss

Was this aspect checked by the treating physician? Yes/ Probably (but not reported in the record) / No

Was this aspect present/ out of range in the patient? Yes/ No

Would you have checked for this aspect? Yes/ No
